# Supplementary material for: Electrostatic interaction based hollow Pt and Ru assemblies toward methanol oxidation
Source: Royal Society of Chemistry journal article supplement (doi:10.1039/c2ra21140h), 2012-01-01
Supplement: c2ra21140h.pdf [file c2ra21140h.pdf]

## Electronic Supplementary Information

### **Electrostatic interaction based hollow Pt and Ru assemblies toward methanol oxidation**

Feng Ye,<sup>a</sup> Jinhua Yang,<sup>b</sup> Weiwei Hu,<sup>a</sup> Hui Liu,<sup>a</sup> Shijun Liao,<sup>c</sup> Jianhuang Zeng\*<sup>c</sup> and Jun Yang\*<sup>ab</sup>

<sup>a</sup>*State Key Laboratory of Multiphase Complex Systems, Institute of Process Engineering, Chinese Academy of Sciences, Beijing, China 100190. Fax: 86-10-8254 4814; Tel: 86-10-8254 4915; E-mail: [jyang@mail.ipe.ac.cn](mailto:jyang@mail.ipe.ac.cn)*

<sup>b</sup>*Institute of Bioengineering and Nanotechnology, The Nanos, 31 Biopolis Way, Singapore 138669*

<sup>c</sup>*School of Chemistry and Chemical Engineering, South China University of Technology, Guangdong Key Laboratory for Fuel Cell Technology, Guangzhou, China 510641. Fax: 86-20-3909 9665; 86-20-3909 9665; Email: [cejhzeng@scut.edu.cn](mailto:cejhzeng@scut.edu.cn)*

We are grateful to Prof. Jim Yang Lee (National University of Singapore) for the use of the XPS facilities. This work was supported by Institute of Bioengineering and Nanotechnology (Biomedical Research Council, Agency for Science, Technology and Research, Singapore), the 100 Talents Program of the Chinese Academy of Sciences, National Natural Science Foundation of China (Project No.: 21173226, 21106151), and Foundation of Guangdong Key Laboratory for Fuel Cell Technology.

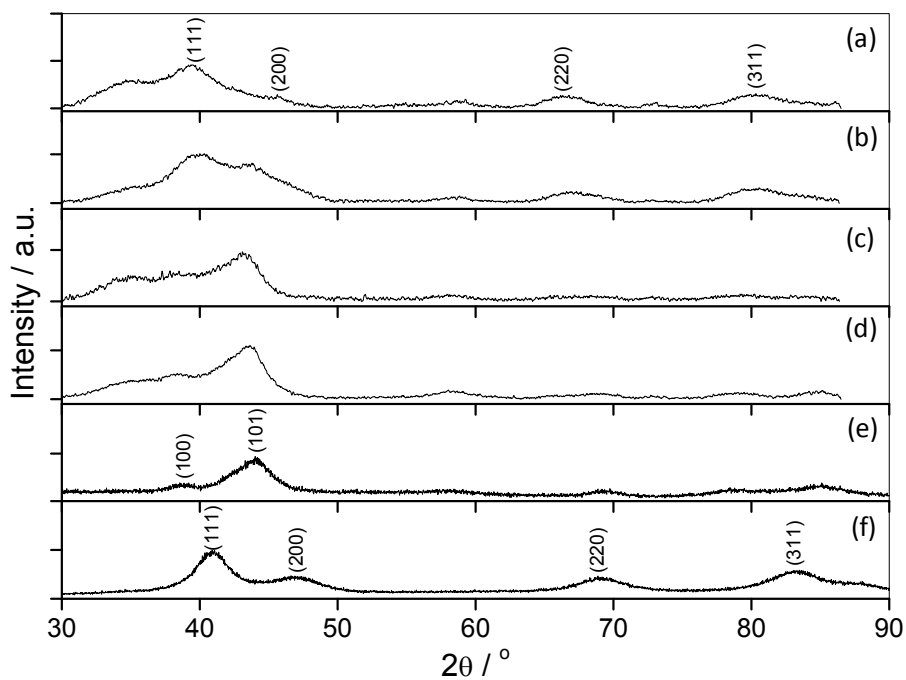

**Fig. S1** XPD patterns of hPt (a), hPt-Ru assemblies at Pt/Ru molar ratio of 2:1 (b), hPt-Ru assemblies at Pt/Ru molar ratio of 1:1 (c), hPt-Ru assemblies at Pt/Ru molar ratio of 1:2 (d), Ru (e), and commercial PtRu/C catalysts (f).

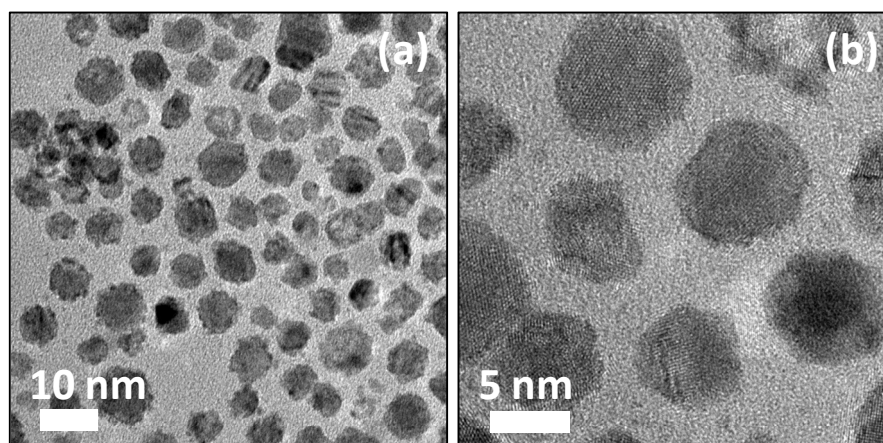

**Fig. S2** TEM image (a) and HRTEM image (b) of core-shell Ag-Pt nanoparticles, which were used subsequently to synthesize hollow Pt nanospheres by BSPP treatment.

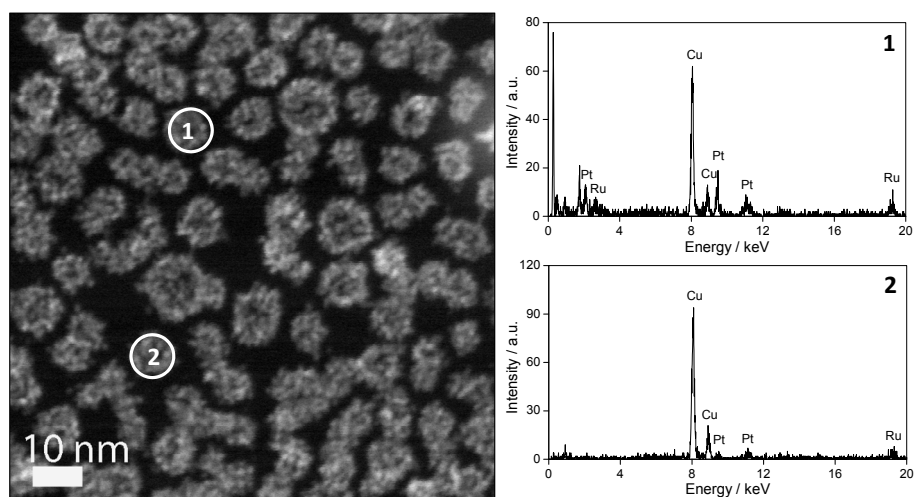

**Fig. S3** STEM image of electrostatic interaction based hPt-Ru assemblies at Pt/Ru molar ratio of 1:1 and EDX analyses of the assembled particles labeled as 1 and 2 respectively in the STEM image.

**Table S1** Electrochemical measurements of methanol oxidation on commercial PtRu/C catalysts, hPt nanospheres, and hPt-Ru assemblies at different Pt/Ru ratios. The data were obtained from Fig. 5a.

| Materials    | Forward Scan Peak Potential (V) | Forward Scan Peak Current Density (mA cm <sup>-2</sup> ) | Backward Scan Peak Potential (V) | Backward Scan Peak Current Density (mA cm <sup>-2</sup> ) |
|--------------|---------------------------------|----------------------------------------------------------|----------------------------------|-----------------------------------------------------------|
| PtRu/C       | 0.66                            | 7.04                                                     | 0.46                             | 3.36                                                      |
| hPt          | 0.68                            | 6.86                                                     | 0.52                             | 5.45                                                      |
| hPt-Ru (2:1) | 0.70                            | 14.5                                                     | 0.54                             | 10.6                                                      |
| hPt-Ru (1:1) | 0.70                            | 10.9                                                     | 0.54                             | 8.69                                                      |
| hPt-Ru (1:2) | 0.66                            | 8.65                                                     | 0.50                             | 5.30                                                      |

**Table S2** The electrochemically active surface area (ECSA) of commercial PtRu/C catalysts, hPt nanospheres, and hPt-Ru assemblies at different Pt/Ru ratios. The data were obtained from Fig. 5d.

| Catalysts  | ECSA (m <sup>2</sup> g <sup>-1</sup> ) |
|------------|----------------------------------------|
| PtRu/C     | 36.4                                   |
| hPt        | 29.7                                   |
| Pt-Ru(2:1) | 25.3                                   |
| Pt-Ru(1:1) | 22.0                                   |
| Pt-Ru(1:2) | 14.4                                   |
